# Supplementary material
Source: publisher figshare collection journal article supplement (https://brill.figshare.com/articles/dataset/_/27850197)
Supplement: Supplementary file 1 [file 1]

## Sheet: ALL DATA
Archive_ID	Family	Taxon	Cultivation	Use 1	Use 2	Use 3	Complexity	Ethymology (Taruma)	Taruma	Taruma_meaning	Bahuana	Bahuana_Source	Nheengatu	Nheengatu_source	Aruaki	Aruaki_Source	Manao	Manao_Source	Omagua	Omagua Source	Wapichan_fieldwork	Wapichan_fieldwork_Meaning	WaiWai_fieldwork	Waiwai__fieldwork_Meaning	Trio_fieldwork	Trio_fieldwork_meaning	Macushi_fieldwork	Macushi_fieldwork_meaning	Atorad	Atorad_Source	Mawayana	Mawayana_Source	WaiWai	WaiWai_Source	Waimiri-Atroari	Waimiri-Atroari_Source	Trio	Trio_source	Pemon	Pemon_source	Macushi	Macushi_Source	Baré	Baré_source	Wayãpi	Wayãpi_source	Lokono	Lokono_source	Kali'na
20210421_06	Pteridaceae	Adiantum argutum Splitg.	W	Mt			Complex	Shared	hohoki adu	curassow's crown											pawish chorizoon	curassow crown	paushï meretïrï	currasow crown		n.a.
20210409_02	Bromeliaceae	Bromeliaceae sp.	C	Mt			Simplex	Unique	nakipa	n.a.	ranana	Ramirez 1992:84									ziini'i	n.a.	kiriwetï	bow string	krewetɨ	bow string	koraya						kiriwétü	Yde 1965:61	karwa	Milliken 1992:23
20210410_04	Anacardiaceae	Anacardium giganteum Hancock ex Engl.	W	Fo			Simplex	Unique	makwe	n.a.											kawarori	n.a.	comota yurusïn	wild cashew	chomota orosɨ	wild cashew	kwaruri						orosü	Yde 1965:82
20210408_04	Anacardiaceae	Anacardium occidentale L.	W	Fo	Md		Simplex	Unique	makika	n.a.	akayu	Ramirez 1992:90	acajú	Stradelli 1929:358							toboichi	n.a.	uruasï	n.a.	oroi	n.a.	orai								hiri	Milliken 1992:23
20210406_06	Bromeliaceae	Ananas comosus (L.) Merr.	C	Fo			Simplex	Borrowed	kobara	n.a.	ifa	Ramirez 1992:84	auacaxy	Stradelli 1929:73					nana	O'Hagan 2011	naan	n.a.	apara	n.a.	afara	n.a.	kayura		naan	George et al 2018	uwaʂa	Coretta 2013:90	apára	Yde 1965:55	nana	Milliken 1992:23	kuyári	Frikel 1973:233	kaiuarag	Koch-Grunberg 1928:48	kaiwara’	Raposo and Souza Cruz 2016:67
20210420_03	Apocynaceae	Aspidosperma sp.	W	Mt			Complex	Shared	badu chinari	axe's handle											baro taba'u	axe's handle	wayap yepu	paddle tree	pukuita	paddle	pregle						wayápuyépu	Yde 1965:90
20210409_05	Arecaceae	Astrocaryum aculeatum G.Mey.	L	Fo	Mt		Simplex	Shared	ta(ka)	n.a.	dakaxi, watsɨ	Ramirez 1992:117	tucumã	Stradelli 1929:628					tuku	O'Hagan 2011	wazi	n.a.	mentu	n.a.	mento	n.a.	wara			George et al 2018	sawara	Meira 2020:104			sykuma	Milliken 1992:101	amana	Meira 2005:646	auara	Koch-Grünberg 1928:46	turu'muwa	Raposo and Souza Cruz 2016:12
20210417_03	Arecaceae	Astrocaryum sp.	W	Mt	Af		Simplex	Unique	kirafo	n.a.											kaiwada-karu	thorn	meeku kuywan		biritu	n.a.							pürü	Yde 1965:298
20210409_04	Arecaceae	Attalea maripa (Aubl.) Mart.	L	Fo	Mt		Simplex	Unique	chada	n.a.	ukarici	Ramirez 1992:117									pokoridi	n.a.	maripa	n.a.	marifa	n.a.	mariiba			George et al 2018	ukatɨ	Meira 2020:99	maripá	Yde 1965:69	mapia	Milliken 1992:105			maliba	Koch-Grünberg 1928:46
20221107_09	Bixaceae	Bixa orellana L.	L	Mt			Simplex	Unique	horia	n.a.	aɸiciba	Ramirez 1992:125	inaia, uruku	Stradelli 1929:230, Epps et al 2022					ruku	O'Hagan 2011	powizi	n.a.	unomto	n.a.	onomto	n.a.	shpɨ								kiswe	Milliken 1992:23			anonle	Koch-Grünberg 1928:45
20210410_05	Malpighiaceae	Byrsonima coccolobifolia Kunth	W	Fo			Simplex	Unique	pichiwi	n.a.											idina	n.a.	woskara cïrïcïrïn	savannah chirichirin	woskara chirichirin	savannah chirichirin	murɨhi
20210410_06	Malpighiaceae	Byrsonima verbascifolia (L.) DC.	W	Fo			Complex	Shared	hichi asukijo	dear's ear										X	aro tain	dear ear	rooporeno cïrïcïrïn	short cïrïcïrïn	roforieno chirichiri	short cïrïcïrïn	põro
20210407_04	Solanaceae	Capsicum annuum L.	L	Fo			Simplex	Unique	nado	n.a.	acici	Ramirez 1992:120	kinha	Stradelli 1929:292					ɨkɨy	O'Hagan 2011	didada	n.a.	asïsï	n.a.	pamai	n.a.	bimi		dihida	George et al 2018			asüsü	Yde 1965:56	warasy	Milliken 1992:23
20210407_03	Caricaceae	Carica papaya L.	L	Fo			Simplex	Borrowed	mapaya, papa	n.a.	mapaye	Ramirez 1992:117	mamo	Stradelli 1929:511							ma'apai	n.a.	mamaya	n.a.	mapai	n.a.	maabɨla			George et al 2018	mabaja	Meira 2020:101	mamayá	Yde 1965:296	mabaia	Milliken 1992:23	mapáya	Frikel 1973:233	mapaza	Koch-Grünberg 1928:4	ma’pîya	Raposo and Souza Cruz 2016:83
20210422_01	Salicaceae	Casearia bicolor Urb.	W	Mt			Complex	Shared	choka kana	corn's pattern											mariki dakutan	corn pattern	kanawa yepu, kukwa	boat tree	kokwa	n.a.
no voucher	Lecythidaceae	Bertholletia excelsa Bonpl.	W	Fo			Simplex	Unique	mẽhẽ	n.a.			kastaya	Epps et al 2023
20210421_11	Costaceae	Costus spiralis (Jacq.) Roscoe	W	Md			Complex	Shared	hakori jiriro	spirit's walking stick											ma'achai wadookori	spirit walking stick	kurushïshï	n.a.	koroshishi	n.a.
20210421_12	Lecythidaceae	Couratari guianensis Aubl.	W	Mt			Complex	Shared	soma o [watare]	tobacco's bark											sooma mada	tobacco bark	wauku	n.a.	wauku	n.a.	kwai pibɨ	tobacco skin					wána	Yde 1965:89	doma, anasa, iryry	Milliken 1992:76									wadara	Grenand 1989:473	wadara	Patte 2011:223	wadara
20210408_03	Bignoniaceae	Crescentia cujete L.	L	Mt			Simplex	Borrowed	koya	n.a.	yemeda	Ramirez 1992:90	kuya	Stradelli 1929:425			jamalu	Ramirez 2020:137	kuya	O'Hagan 2011	korowachi	n.a.	tutumo	n.a.	kariwa	n.a.	raabɨ				kawalie	Farabee 1918:284	tutumó	Yde 1965:247	bixiwa	Milliken 1992:23	karíwa	Mans 2012:233	arapö		araapî	Raposo and Sousa Cruz 2016:21
20210406_02	Cucurbitaceae	Cucurbita sp.	C	Fo			Simplex	Borrowed	yama, [awayáma]	n.a.	yurumu	Ramirez 1992:93	curuua	Stradelli 1929:76			jölölu	Ramirez 2020:137			kawiam	n.a.	awayama	n.a.	awayama	n.a.	kaima						awayáma	Yde 1965:293	xirimu	Milliken 1992:23	wáykara, atura	Frikel 1973:234	kauzama	Koch-Grunberg 1928:48	kaiyuma	Raposo and Souza Cruz 2016:68
20210409_06	Dilleniaceae	Curatella americana L.	W	Mt	Md		Simplex	Unique	birijanako	n.a.											iminaru	n.a.	kamara kñuru	tiger tonge		n.a.	gratkiye
20210407_01	Dioscoreaceae	Dioscorea alata L.	C	Fo			Simplex	Borrowed	pirisha	n.a.	iteRu	Ramirez 1992:107									kiricha	n.a.	mapïtu	n.a.	mafitu	n.a.	griʒa			George et al 2018	lisu	Farabee 1918:286	napitó	Yde 1965:296			aráyawa	Frikel 1973:233	pirisa		kariisa	Raposo and Souza Cruz 2016:71
20210409_01	Dioscoreaceae	Dioscorea trifida L.f.	C	Fo			Simplex	Borrowed	karowa	n.a.	iteRu	Ramirez 1992:107	cará	Stredelli 1929:397	ditʃu	Ramirez 2020:136	ödüru	Ramirez 2020:137	kara	O'Hagan 2011	chupoi	n.a.	napï	n.a.	naafi	n.a.	shpuya				kalua	Farabee 1918:287	napí	Yde 1965:54	nepy	Milliken 1992:23	námixi, aráyawa	Frikel 1973:233, 234	napü		kará	Raposo and Sousa Cruz 2016:78
20210421_07	Annonaceae	Duguetia sp.	W	Mt			Complex	Unique	kwakipa	n.a.			pindaiwa mirá	Epps et al 2023							kobaui taba'u	fishing rod stick	kïïwï yecepu	fishing rod	pakira shiwi	pecari smell	konailepu
20210417_05	Arecaceae	Euterpe oleracea Mart. Euterpe precatoria Mart.	W	Fo	Mt		Simplex	Borrowed	wabo	n.a.	mana'a	Ramirez 1992:116	uasi	Stredelli 1929:116							wabo, kochoizai / kochoizun	n.a.	wapu, manaka	n.a.		n.a.	sɨye				wabu	Meira 2020:95	wapú	Yde 1965:69	wesi, manaka	Milliken 1992:103	wapú	Frikel 1973:239	wanakapi		assai	Koch-Grunberg 1908:28
20210421_04	Maranthaceae	Goeppertia sp.	W	Md			Complex	Shared	charaba ada	turtle's head											mokoro dani	mokoro child	kwacï tïpïru meuru	tortoise head colour		n.a.
20210406_03.1	Malvaceae	Gossypium hirsutum L.	L	Mt			Simplex	Unique	suja [molu]	n.a.	ciñarɨ	Ramirez 1992:94	amaniu	Stradelli 1929:292					amaniú	O'Hagan 2011	kinaridi	n.a.	mawrï	n.a.	maurɨ	n.a.	ktooga		kinaruhi	George et al 2018	molu	Farabee 1918:286					marú		ketewag	Koch-Grünberg 1928:48	kotoʔkaʔ
20210406_03.2	Malvaceae	Gossypium hirsutum L. 'Brown'	L	Mt			Complex	Shared	mo idi												suburu idi	howler hair	tusmuyem mawrï	brown cotton	tuswuyem maurɨ	brown cotton	araota shibo	howler hair					maúre	Yde 1965:61
20210421_02	Poaceae	Gynerium sagittatum (Aubl.) P.Beauv.	W	Mt			Simplex	Unique	koba	n.a.			tucuara, kanarana	Stradelli 1929, Epps et al 2023					ɨwatuma	O'Hagan 2011	bairi	n.a.	waywï	n.a.	pɨrou	n.a.	pɨrɨu						waywü	Yde 1965:62	mapyry	Milliken 1992:23
20210421_10	Balanophoraceae	Helosis cayennensis (Sw.) Spreng.	W	Md			Complex	Shared	kwaikwi kwakiso	laba's sifted cassava											ma'achai chu'u	spirit penis	yawarï natïrï	yawari's plant		n.a.	orana kisere'narɨ	laba's sifted casaava
20221107_27.2	Araceae	Heteropsis flexuosa (Kunth) G.S.Bunting	W	Mt			Simplex	Shared	bĩwa	n.a.	mamɨrɨ	Ramirez 1992:109	xipu	Epps et al 2023							tibi	n.a.	arapapeto	n.a.	arafa feto		munale				chebi	Yde 1965:70
20210407_06	Malvaceae	Hibiscus sabdariffa L.	L	Fo			Simplex	Borrowed	sariri	n.a.												n.a.	kapikara merëtïrï	chicken crown	korairo ipotɨpa	chicken crown
20210417_02	Fabaceae	Hymenaea courbaril L.	W	Fo	Md	Fu	Simplex	Borrowed	nachi	n.a.	yadarɨ	Ramirez 1992:85									natu	n.a.	pïrïpïrï	n.a.	kahru	n.a.	muire								ximri	Milliken 1992:81
20210408_02	Fabaceae	Inga spp.	L	Fo			Simplex	Unique	shirika	n.a.	kubici	Ramirez 1992:85	inga	Epps et al 2023							korami	n.a.	kïpïshï	n.a.	patai	n.a.	makamkari						kepishi	Yde 1965:74
20210409_03	Convulvulaceae	Ipomoea batatas (L.) Lam.	C	Fo			Simplex	Borrowed	afi	n.a.	kaci	Ramirez 1992:117	jetyca	Stredelli 1929:127					itikia	O'Hagan 2011	kaazuu	n.a.	parï	n.a.	fari	n.a.	asa				katɨ	Meira 2020:102	pári	Yde 1965:54	mepe	Milliken 1992:23	nápi	Frikel 1973:233	kuaíko		na'	Amódio and Pira 2007:140
20210422_03	Marantaceae	Ischnosiphon longiflorus K.Schum.	W	Md			Complex	Shared	naki orokoda	trumpeter ear											namachi kodoro	trumpeter ear	cesï	n.a.	cheesɨ	n.a.	kaamiiseemu
20210420_05	Maranthaceae	Ischnosiphon arouma (Aubl.) Körn	W	Mt			Simplex	Unique	dakika	n.a.											mokoro	n.a.	tuuwa	n.a.	towa	n.a.	mana						toowá	Yde 1965:257	baky
20210408_01	Cucurbitaceae	Lagenaria siceraria (Molina) Standl.	L	Mt			Simplex	Borrowed	wa'iri [golie]	n.a.	kamukurɨ	Ramirez 1992:91									moto	n.a.	urutoo	n.a.	urutu	n.a.	ma				kawalie	Farabee 1918:284	urútiyatü	Yde 1965:66			mú:ra	Frikel 1973:145	wai		wai	Raposo and Sousa Cruz 2016:122							godu
20210406_05.1	Euphorbiaceae	Manihot esculenta Crantz	C	Fo			Simplex	Unique	nito	n.a.	kanɨRɨ	Ramirez 1992:111	manioca	Stredelli 1929:255	kanöti	Ramirez 2020:136	kaniri	Ramirez 2020:137	yawiri	O'Hagan 2011	waunii	n.a.	shere	n.a.	shere	n.a.	kseera		kanuzu	George et al 2018	kaːsɨ, kãːsɨ	Meira 2020:100	shére	Yde 1965:28	minja	Milliken 1992:23
20210406_05.2	Euphorbiaceae	Manihot esculenta Crantz 'Sweet'	C	Fo			Simplex	Borrowed	makashira	n.a.	makaxera	Ramirez 1992:111	macaxera	Stradelli 1929:503							makashiza	n.a.	makashera	n.a.		n.a.	agiguus kse		makashira	George et al 2018			shéretáhsum	Yde 1965:298	makaxira	Milliken 1992:23	makaxéra	Frikel 1973:237		Koch-Grünberg 1928:47	makaisera	Raposo and Sousa Cruz 2016: 82
20210410_03	Sapotaceae	Manilkara bidentata (A.DC.) A.Chev	W	Fo	Mt		Simplex	Unique	bikiro	n.a.											izari	n.a.	shaawoo	n.a.	tãkɨ̃kɨ̃	chewing gum	puruwele						shaü	Yde 1965:298	parteki	Milliken 1992:110
20210417_01	Arecaceae	Mauritia flexuosa L.f.	W	Fo	Mt	If	Simplex	Borrowed	chiwi	n.a.	itiwi	Ramirez 1992:117	myryty	Stredelli 1929:262					mɨrɨti	O'Hagan 2011	dyuwuza	n.a.	yuwoo	n.a.	you	n.a.	kuwai		iwuza	George et al. 2018	jɨwɨ	Meira 2020:96	yaú	Yde 1965:69	mixi	Milliken 1992:104	kóy	Frikel 1973:239	kuai	Koch-Grünberg 1928:46	kuwai	Raposo and Souza Cruz 2016:79
20210407_02	Musaceae	Musa spp.	C	Fo			Simplex	Unique	piroka	n.a.	kuratana	Ramirez 1992:88	pacoa	Stredelli 1929:124	auwaʃi	Ramirez 2020:136	banala	Ramirez 2020:137	panara	O'Hagan 2011	suuzu	n.a.	tushïba	n.a.	tushɨba	n.a.	pruru		chuuzu	George et al 2018	sɨsɨɓa	Meira 2020:96	tushmá	Yde 1965:299	wyky	Milliken 1992:23
20210410_02	Nephrolepidaceae	Nephrolepis spp.	W	Md			Complex	Shared	mo ajowa	howler's tail											soburu dyuo	howler tail	phomniko	n.a.
20210407_05	Solanaceae	Nicotiana tabacum L.	L	Md	Su		Simplex	Borrowed	soma, [tuma]	n.a.	cibeRu	Ramirez 1992:129	pityma	Stredelli 1929:334	libaʃada; pɨtumatʃe	Ramirez 2020:136	aili	Ramirez 2020:137	pɪtɨma	O'Hagan 2011	soom	n.a.	kamashu	n.a.	kamashu	n.a.	kowai		choom	George et al 2018	tuma	Meira 2020:104	kamashú	Yde 1965:294	cauiai	Rodrigues 1885:258	támue	Epps et al. 2023	kavai, tamu	Epps et al. 2023	kawáí	Epps et al. 2023
20210417_04	Arecaceae	Oenocarpus bacaba Mart.	W	Fo	Mt		Simplex	Unique	chamani	n.a.	kicici	Ramirez 1992:116	yuacaua	Stredelli 1929:123					manaka	O'Hagan 2011	mapuza	n.a.	kumu	n.a.	komo	n.a.	kung				mɨʂɨ	Meira 2020:95	kúmu	Yde 1965:69	kymy	Milliken 1992:103			kun	Koch-Grünberg 1928:4
20221107_25	Arecaceae	Oenocarpus bataua Mart.	W	Fo			Simplex	Unique	hoga	n.a.	kimiri	Ramirez 1992:117	patauá	Stredelli 1929:279							ochoro	n.a.	kwanamarï	n.a.	kwanamari	n.a.	kwaruma						wanamari	Yde 1965:89
20210422_02	Fabaceae	Parkia sp.	W	Mt			Complex	Shared	fwa kana	fire's pattern											itikizu	fire	yakwe yaporï		mara	n.a.
20210421_01	Strelitziaceae	Phenakospermum guyannense (A.Rich.) Endl. ex Miq.	W	Mt			Simplex	Unique	peritono [piroka joka]	banana's leaf											suuzu ana(ba)	banana leaf	waphuya	n.a.	wafuya
20210420_04	Burseraceae	Protium sp.	W	Fo	Af		Simplex	Borrowed	bawawa	n.a.											bawawao	n.a.	weyapyepu	gum tree		n.a.
20210421_05	Burseraceae	Protium sp.	W	Mt	Md	Su	Simplex	Unique	zu'i	n.a.											marowaiba	n.a.	ayawa yehku	candle tree	aiwa	n.a.	marowale						weeyó	Yde 1965:90
20210421_09	Zingiberaceae	Renealmia sp.	W	Md			Simplex	Unique	fofokani	n.a.											wiziizo tana'a	ground itch cure	kutukyem yarï	stink leaf		n.a.	kureedaipi
20210406_07	Poaceae	Saccharum officinarum L.	C	Fo			Simplex	Unique	jitoka	n.a.			muriceen, periceen, tauocoa	Stredelli 1929:139					uwakɨra	O'Hagan 2011	kaiwara	n.a.	parancï	n.a.	parãchi	n.a.	kayuragu			George et al 2018			paranchi	Yde 1965:297	awaxe	Milliken 1992:23
20210420_02	Fabaceae	Schnella sp.	W	Mt	Md		Complex	Shared	jini toro	turtle's ladder											wurada poza	turtle ladder	wayam kamïsan	turtle pants	kuria pang	turtle pants
20210406_04	Solanaceae	Solanum subinerme Jacq.	C	Md			Simplex	Borrowed	kobichi	n.a.			cumbio	Stradelli 1929:164							kobotu	n.a.	chïkyam	n.a.	chikyam	n.a.	pungrere peru										konomi	Frikel 1973:51					kubiju	Lev et al 2023
20210406_01	Fabaceae	Tephrosia sinapou (Buc'hoz) A.Chev. Paullinia sp.	L	Md	fp		Simplex	Borrowed	hayari	n.a.			timbu, kunambi (Lonchocarpus)	Epps et al 2023							aya, kokizai	n.a.	ayaa, omawa yatï	omawa vine	aya, omawa	n.a.	aya				oku	Yde 1965:75	kumawa	Yde 1965:138
20210421_03	Cyclanthaceae	Thoracocarpus bissectus (Vell.)	W	Mt			Simplex	Unique	chokapa, supijo	n.a.											mamuza	n.a.	momyatï	n.a.	momyatɨ, arafa feto		komiye				mamɨrzɨ	Yde 1965:80	arapapito	Yde 1965:70
20210420_01		Unidentified tree	W	Md			Simplex	Unique	kiyaku, jasu asukijo	fish sp.'s ear											soiriki tain	fish sp. ear	yasphïchu	oldman skin	yasfichho	oldman skin
20210410_01	Araceae	Xanthosoma sagittifolia (L.) Schott, Colocasia ​​esculenta (L.) Schott	C	Fo			Simplex	Unique	korona	n.a.			tayuba	Epps et al 2023							kowun	n.a.	kumho	n.a.	komho	n.a.	eedo						kumhotó	Yde 1965:54
20221107_23	Poaceae	Zea mays L.	C	Fo			Simplex	Unique	choka	n.a.	awaci	Ramirez 1992:110	auaty	Stredelli 1929:262	kawitʃi	Ramirez 2020:136	awati	Ramirez 2020:137	awati	O'Hagan 2011	maziki	n.a.	nasïnasï	n.a.	anai	n.a.	aanai		maziki		mariki	Meira 2020:97					aanai	Meira 2005:644	a'naig	Koch-Grunberg 1928:47	annei	Koch-Grunberg 1908:28
[truncated: 9 more columns]

## Sheet: PRODUCTS
English	Portugese	Etymology	Type (Taruma)	Ethymology (Taruma)	Taruma	Wapichan	Wapichan Source	Atorad	Atorad Source	Bahuana	Bahuana_Source	WaiWai	WaiWai_Source	Aruaki	Aruaki_Source	Nheengatu	Nheengatu_source	Manao	Manao_Source	Mawayana	Mawayana_Source	Waimiri-Atroari	Waimiri-Atroari_Source	Trio	Trio_source	Pemon	Ticuna	Ticuna source	Pemon source	Macushi	Macushi_Source	Aruan	Aruan Source	Kakua	Kakua source	Yuhup	Yuhup source	Cocama	Cocam	Paumarí	Paumarí source	Omagua	Omagua Source
cassava bread	beijú	borrowed	Simplex	borrowed	cho’i	badi	Wapishana Language Project 2000:17	bahi	George et al 2018	yau	Ramirez 1992:20	cuure	Hawkins 1998:195	chüj	Ramirez 2020:137	mbeiu	Stradelli 1929:128	abutu	Remirez 2020:137			meie	Bruno 1996:15	wïi	Meira 2005:707	ekei			Koch-Grünberg 1928:47	ikai	Raposo and Sousa Cruz 2016:40.	yçahále	Penna 1881:21	ʧɨjʔ	Bolaños 2016:43	kooy	Cácio and Silva 2012:208			karagoahi	Meinke and Chapman 1998		O’Hagan 2011:29
fire fan	abano	shared	Simplex	shared	marawi	awaribai	Wapishana Language Project 2000:16	marawi	George et al 2018	marawi	Ramirez 1992:101	wayapamsü	Yde 1965:300			tapecua	Stradelli 1929:663			wiribe	Meira 2020:98	kwirba	Milliken 1992:101	sipari	Meira 2000:202	woriwori			Koch-Grünberg 1928:19	wuriwò	Koch-Grünberg 1908:21	malaj	Penna 1881:21		Bolaños 2016:43	sak-póy	Cácio and Silva 2012:257	marawe	Vallejos and Amías Murayari 2015:127	diriri	Meinke and Chapman 1998	wawta	O’Hagan 2011:29
cassava sieve	peneira	borrowed	Simplex	borrowed	komata	manaɾɨ	Wapishana Language Project 2000:57			tsifarɨta	Ramirez 1992:90	manaɾi	Yde 1965:296			kumata, urupema	Stradelli 1929:286			manaɾɨ	Meira 2020:102	mare	Milliken 1992:31	manaɾe	Meira 2005:688	panga			Koch-Grünberg 1928:19	manaɾi	Raposo and Sousa Cruz 2016:83	chyrridy	Penna 1881:21		Bolaños 2016:43	tĩj-maj	Cácio and Silva 2012:286	kumata	Vallejos and Amías Murayari 2015:110	maravi	Meinke and Chapman 1998	komata	O’Hagan 2011:10
cassava flour (farina)	farinha	borrowed	Simplex	borrowed	o’i	o'i	Wapishana Language Project 2000:101									uĩ	Epps et al 2023							kajama	679		uí	Epps et al. 2023		u'wi	Raposo and Sousa Cruz 2016:83
