# Supplementary material
Source: publisher figshare collection journal article supplement (https://brill.figshare.com/articles/dataset/_/27850197)
Supplement: Supplementary file 1 [file 1]

Appendix 1. Preliminary Taruma orthography.

| Phoneme           | Main allophones                       | Grapheme | Example        | English translation |
|-------------------|---------------------------------------|----------|----------------|---------------------|
| /a/               | [a]                                   | <a>      | <i>achi</i>    | eye                 |
| /ã/               | [ã, ãN]                               | <ã>      | <i>karãgwa</i> | otter               |
| /b/               | [b]                                   | <b>      | <i>abara</i>   | back                |
| /d/               | [d]                                   | <d>      | <i>danu</i>    | tiger               |
| /dz/              | [dz]                                  | <j>      | <i>ja'ara</i>  | pet                 |
| /ɸ <sup>w</sup> / | [ɸ <sup>w</sup> ]                     | <fw>     | <i>fwa</i>     | fire                |
| /g/               | [g, g <sup>j</sup> ]                  | <g>      | <i>gomichi</i> | woman               |
| /g <sup>w</sup> / | [g <sup>w</sup> ]                     | <gw>     | <i>gwi</i>     | to dig              |
| /h/               | [h]                                   | <h>      | <i>hama</i>    | I, my               |
| /i/               | [i]                                   | <i>      | <i>bikiro</i>  | balata              |
|                   | [j]                                   | <y>      | <i>goro</i>    | slow                |
| /ĩ/               | [ĩ, iN]                               | <ĩ>      | <i>bahĩ</i>    | kill                |
| /k/               | [k, k <sup>h</sup> , k <sup>j</sup> ] | <k>      | <i>koba</i>    | arrow               |
| /k <sup>w</sup> / | [k <sup>w</sup> ]                     | <kw>     | <i>kwasu</i>   | person              |
| /m/               | [m]                                   | <m>      | <i>maragwi</i> | fan                 |
| /n/               | [n, n <sup>j</sup> ]                  | <n>      | <i>nakani</i>  | to know             |
| /o/               | [o, u]                                | <o>      | <i>orokoda</i> | knee                |
| /õ/               | [õ, õN]                               | <õ>      | <i>ahõ</i>     | hand                |
| /p/               | [p, p <sup>h</sup> , p <sup>j</sup> ] | <p>      | <i>pana</i>    | dawn                |
|                   | [ɸ]                                   | <f>      | <i>fona</i>    | wasp                |
| /r/               | [r]                                   | <r>      | <i>rora</i>    | many                |
| /s/               | [s]                                   | <s>      | <i>sari</i>    | tomorrow            |
| /ɕ/               | [ɕ]                                   | <sh>     | <i>shonora</i> | crane               |
| /t/               | [t]                                   | <t>      | <i>taki</i>    | ask                 |
| /tɕ/              | [tɕ]                                  | <ch>     | <i>chinari</i> | shin                |
| /i/               | [i]                                   | <u>      | <i>suwi</i>    | throw away          |
|                   | [ɛ]                                   | <e>      | <i>hera</i>    | arrive              |
| /ĩ/               | [ĩ, iN]                               | <ũ>      | <i>wũ</i>      | stink               |
| /w/               | [w]                                   | <w>      | <i>wara</i>    | put                 |
| /z/               | [z, dz]                               | <z>      | <i>hoza</i>    | rain                |
| /ʔ/               | [ʔ]                                   | <'>      | <i>ja'o</i>    | give                |

The Taruma phoneme inventory consists of 20 consonant and 8 vowel phonemes. The principal phonological processes include the palatalization of most consonants before /i/ and the lenition of /p/ before /o/. Taruma is non-tonal, and stress is generally penultimate.
