# Supplementary material
Source: publisher figshare collection journal article supplement (https://brill.figshare.com/articles/dataset/_/27850197)
Supplement: Supplementary file 2 [file 1]

## Appendix 2. Sources for comparative analysis

- Amódio, Emanuele and Vicente Pira. 2007. *Makusi Maimu. Língua Makuxi: Guia para a Aprendizagem e Dicionário Makuxi*. Manaus: Valer Editora.
- Barral, Basilio M. de. 1979. *Diccionario Warao-Castellano, Castellano-Warao*. Caracas: Universidad Católica Andrés Bello.
- Bolaños, Katherine. 2016. *A Grammar of Kakua*. Utrecht: LOT.
- Bruno, Ana Carla dos Santos. 1996. *Dicionário Waimiri-Atroari-Português*. Manaus: Programa Waimirí-Atroari / Conevênio FUNAI-Eletronorte.
- Cácio, Silva and Elisângela Silva. 2012. *A Língua dos Yuhupdeh: Introdução Etnolinguística, Dicionário Yuhup-Português e Glossário Semântico-Gramatical*. São Gabriel da Cachoeira: Pró-Amazonia.
- Coretta, Stefano. 2013. *The Phonology of Mawayana*. MA thesis, Università degli Studi di Pavia.
- Courtz, Hendrik. 2008. *A Carib Grammar and Dictionary*. Toronto, Canada: Magoria Books.
- Farabee, William Curtis. 1918. *The Central Arawaks*. Philadelphia: The University of Pennsylvania, The University Museum.
- Epps, Patience. 2023. South American Languages. In Claire Bower, Patience Epps, Jane Hill, and Patrick McConvell (eds.), *Languages of Hunter-Gatherers and Their Neighbors*. Available online at <https://huntergatherer.la.utexas.edu> (accessed June 18, 2023).
- Frikel, Protásio. 1973. Os Tiriýó, Seu Sistema Adaptivo. *Völkerkundliche Abhandlungen*, 5. Hannover: Münstermann.
- George, Christine, Lawrence Joseph, Felix Xavier and Gladwyn Kingsley Noble Jr.. 2018. *Linguistic Materials on Indigenous Languages of Guyana*. California Language Archive, Survey of California and Other Indian Languages, University of California, Berkeley.
- Grenand, Françoise. 1989. *Dictionnaire Wayãpi-Français: Lexique Français-Wayãpi: Guyane Française*. Paris: Peeters : SELAF.
- Hawkins, Robert E. 1998. Wai Wai. In Desmond C. Derbyshire and Geoffrey K. Pullum (eds.), *Handbook of Amazonian languages IV*, 25–225. Berlin: Mouton de Gruyter.
- Hunter, Rita and Ray Stegeman. 2014. *Akawaio-English Dictionary and English-Akawaio Index*. SIL International.
- Klooster, Charlotte I.E.A. van 't, Jan C. Lindeman, and Marion J. Jansen-Jacobs. 2003. Index of Vernacular Plant Names of Suriname. *Blumea Supplement* 15: 1–322.

- Koch-Grünberg, Theodor. 1908. Die Makuschí und Wapischána. *Zeitschrift für Ethnologie* 40: 1–44.
- Koch-Grünberg, Theodor. 1928. *Vom Roraima zum Orinoco*. Vol. IV. Stuttgart: Strecker und Schröder.
- Mans, Jimmy. 2012. *Amotopoan Trails: A Recent Archaeology of Trio Movements*. Leiden: Leiden University.
- Meinke, Salzer and Shirley Chapman. 1998. *Dicionário Bilíngue nas Línguas Paumari e Portuguesa*. Porto Velho: SIL International.
- Meira, Sérgio. 2000. A Reconstruction of Proto-Taranoan: Phonology and Morphology. Muenchen: Lincom Europa.
- Meira, Sérgio. 2005. *A Grammar of Tiriyo*. Berlin; New York: Mouton de Gruyter.
- Meira, Sérgio. 2020. A Study of the Genetic Relation between Mawayana and Wapishana (Arawakan Family). *Revista Brasileira de Línguas Indígenas* 2(1): 70.
- Milliken, William. 1992. *The Ethnobotany of the Waimiri Atroari Indians of Brazil*. Kew: Royal Botanic Gardens.
- O'Hagan, Zachary. 2011. *Diccionario del Idioma Omagua*. Downloadable at [https://saludconlupa.com/documents/39/omagua\\_fw2011\\_dict\\_TO\\_TAL\\_FINAL.pdf](https://saludconlupa.com/documents/39/omagua_fw2011_dict_TO_TAL_FINAL.pdf) (accessed June 18, 2023).
- Patte, Marie-France. 2011. *La Langue Arawak de Guyane: Présentation Historique et Dictionnaires Arawak-Français et Français Arawak. Didactiques*. Marseille: IRD éditions, Institut de recherche pour le développement.
- Penna, Domingos Soares Ferreira. 1881. Algumas Palavras da Lingua dos Indios Aruans. *Archivos Do Museu Nacional Do Rio de Janeiro* 4: 15–25.
- Ramirez, Henri. 1992. Le Bahuana une Nouvelle Langue de la Famille Arawak. Paris, Association d'ethnolinguistique amérindienne.
- Ramirez, Henri. 2020. *Enciclopédia das línguas Arawak: Acrescida de Seis Novas Línguas e Dois Bancos de Dados*. Curitiba, Brasil: Editora CRV.
- Raposo, Celino Alexandre, and Maria Odileiz Sousa Cruz. 2016. *Dicionário da Língua Makuxi*. Boa vista: Editora da UFRR.
- Stradelli, Ermanno. 1929. *Vocabulários da Língua Geral Portuguez-Nheêngatú e Nheêngatú-Portuguez*. Rio de Janeiro: Revista do Instituto Histórico e Geográfico Brasileiro.
- Vallejos, Rosa, and Rosa Amías Murayari. 2015. *Diccionario Kukama-Kukamiria Castellano*. Lima: Programa de Formación de Maestros Bilingües de la Amazonía Peruana-FORMABIAP y AIDSESP.

Wapishana Language Project. 2000. *Scholar's Dictionary and Grammar of the Wapishana Language*. San Jose via Lethem, Guyana: Wapishana Language Project.

Yde, Jens. 1965. *Material Culture of the Waiwai*. Copenhagen: National Museum of Denmark.
